# Supplementary material for: Acontia, a Specialised Defensive Structure, Has Low Venom Complexity in Calliactis polypus
Source: MDPI journal article supplement (doi:10.3390/toxins15030218), 2023-03-12
Supplement: s1 [file s1]

# Supplementary Materials: Acontia, a Specialised Defensive Structure, Has Low Venom Complexity in *Calliactis polypus*

Hayden L. Smith, Peter J. Prentis, Scott E. Bryan, Raymond S. Norton and Daniel A. Broszczak

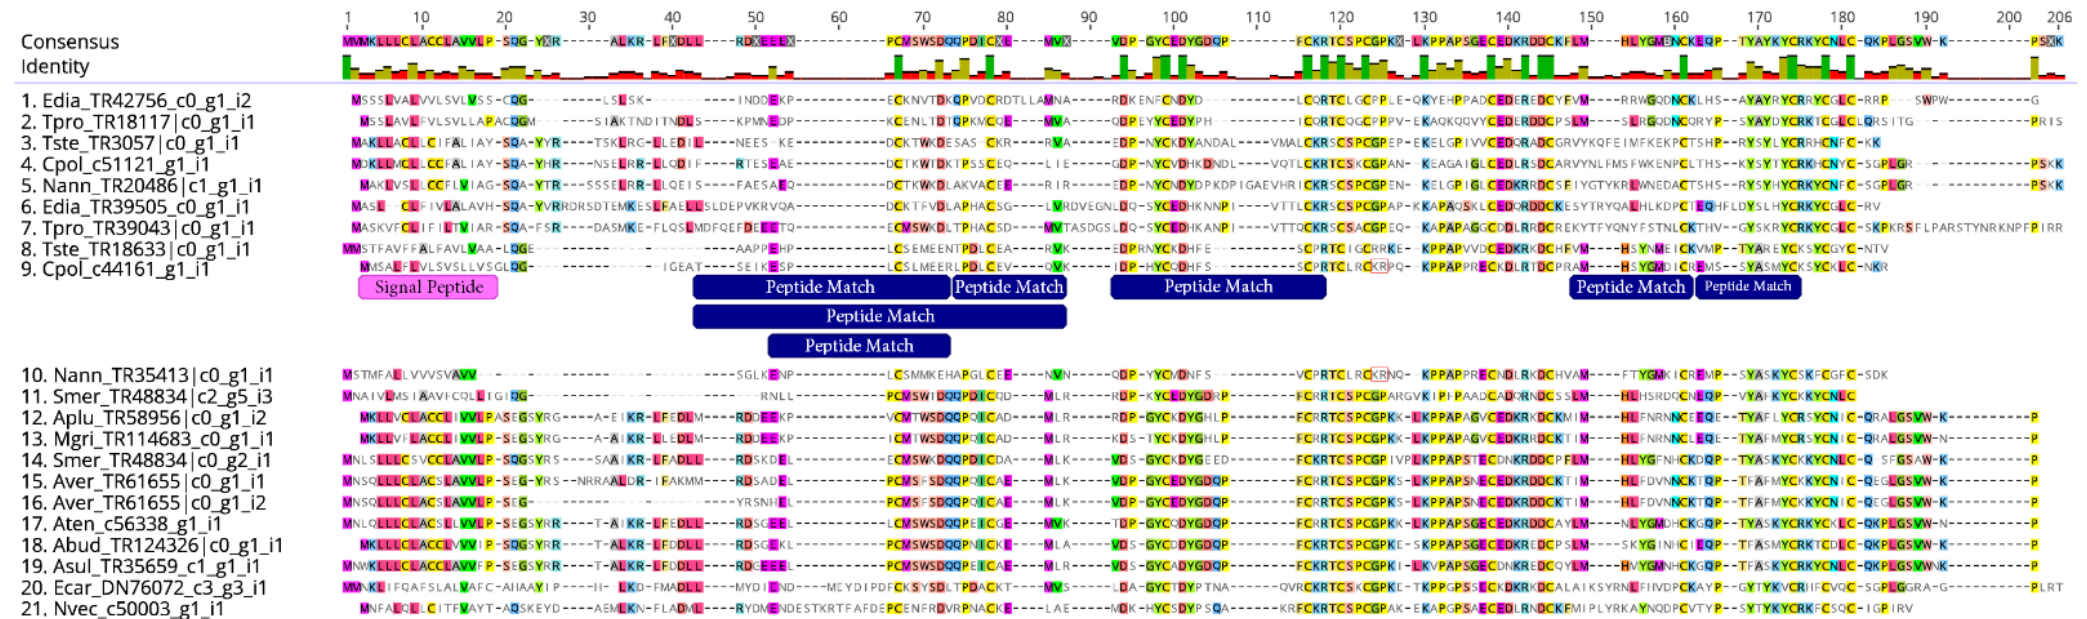

**Figure S1.** Alignment of amino acid sequences for the Unknown 12C candidate genes and the consensus sequence and identity percentage above. Annotation of the candidate identified in the *Calliactis polypus* acontia proteome is depicted with the signal peptide and peptide matches from the mass spectra of the SWATH-MS and DDA pooled acontia sample. Consensus identity percentages are as follows, green bar for 100 %, yellow bar for ≥ 50 % and < 100 %, and red bar for < 50 %.
