# Supplementary material for: Acontia, a Specialised Defensive Structure, Has Low Venom Complexity in Calliactis polypus
Source: Toxins (Basel). 2023 Mar 12;15(3):218. doi: 10.3390/toxins15030218 (PMC10051995; doi:10.3390/toxins15030218)
Supplement: Supplementary file 1 [file toxins-15-00218-s001.zip]

Archive with 4 entries (4 files):
- toxins-2260107-Supplementary Material S1.pdf
- toxins-2260107-Supplementary Material S2.xlsx
- toxins-2260107-Supplementary Material S3.xlsx
- toxins-2260107-Supplementary Material S4.xlsx
