# Supplementary material for: Acontia, a Specialised Defensive Structure, Has Low Venom Complexity in Calliactis polypus
Source: Toxins (Basel). 2023 Mar 12;15(3):218. doi: 10.3390/toxins15030218 (PMC10051995; doi:10.3390/toxins15030218)
Supplement: Supplementary file 1 [file toxins-15-00218-s001.zip › toxins-2260107-Supplementary Material S2.xlsx]

## Sheet: Toxin Discoveries
Unlikely to be a toxin		Possible toxin		Uncharacterized function		Peptide hits
		*Variant to known structure
Toxin Descriptors		Transcriptome (Whole Tissue)				Proteome (Acontia Tissue)
Toxin Family	Toxin Type	Contig	Blast Accession	Blast Decriptor	Blast e-value	Peptide Hits (Conf ≥95)	SMART Hit	SMART e-value
AVIT	Prokineticin	c54442_g1_i1	XP_020904154.1	uncharacterized protein	2e-20	0	N/A
Calmodulin / Alpha-actinin	Calglandulin	c51189_g1_i1	XP_031559709.1	Calumenin	8e-106	0	3x Pfam: EF-hand_7	8.1E-8 | 1.4E-6 | 5.9E-8
CREC	Calcium ion binding	c51518_g1_i1	XP_020899587.1	Calumenin	5e-126	0	3x Pfam:EF-hand_7	5.5E-4 | 7.9E-6 | 8.4E-4
CREC	Calcium ion binding	c52289_g1_i1	XP_020907325.1	Calumenin	8e-114	0	3x Pfam:EF-hand_7	4.7E-3 | 2.4E-6 | 1.3E-7
CREC	Calcium ion binding	c55104_g1_i1	XP_020907325.1	Calumenin	8e-114	0	2x Pfam:EF-hand_7	2.4E-6 | 1.3E-7
CREC	Calcium ion binding	c58101_g1_i1	XP_020915628.1	Calumenin	7e-163	0	3x Pfam:EF-hand_7	1.8E-4 | 9.5e-10 | 1.3E-6
CREC	Calcium ion binding	c60488_g1_i1	XP_020903128.1	Calumenin	7e-108	0	2x Pfam:EF-hand_7	8.2e-7 | 2.6E-5
Lectin	C-type	c45856_g1_i1	XP_031559201.1	C-type mannose receptor	1e-92	0	C-type lectin | PAN_1	3.57e-30 | 4e-8
Lectin	C-type	c52826_g1_i3	XP_028518745.1	uncharacterized protein	0	0	C-type lectin	8.81e-21
Lectin	C-type	c53265_g1_i1	XP_020910587.1	Snaclec coagulation factor IX-binding protein subunit A	9e-47	0	C-type lectin	1.6e-32
Lectin	C-type	c53552_g1_i1	XP_020894921.1	Secretory phospholipase A2 receptor	0	0	2x C-type lectin | VWA	3.52e-20 | 2.07e-17 | 7.74e-38
Lectin	C-type	c55476_g1_i2	XP_020910587.1	Snaclec coagulation factor IX-binding protein subunit A	4e-41	0	C-type lectin	4.63e-38
Lectin	C-type	c56486_g1_i1	XP_020913629.1	C-type lectin	3e-47	0	C-type lectin | PAN_1	4.04e-29 | 2.3E-6
Lectin	Ficolin	c60639_g1_i1	XP_031556939.1	Fibrinogen C domain-containing protein	8e-108	3	FBG	1.5e-113
Lectin	C-type	c61248_g1_i2	XP_031553545.1	uncharacterized protein	7e-48	0	C-type lectin	4.58e-19
Lectin	Ficolin	c64004_g1_i1	KXJ19051.1	Fibroleukin	8e-77	0	FBG	8.3e-75
Lipase	Phospholipase A2	c41197_g1_i1	XP_020914887.1	Phospholipase A2 isozyme PA3/5	3e-45	0	PA2c	0.0233
Lipase	Phospholipase D	c51770_g1_i1	XP_031566464.1	Ectonucleotide pyrophosphatase/phosphodiesterase family member 5	0	0	Pfam:Phosphodiest	7.2e-71
Lipase	Phospholipase B	c52135_g1_i1	KXJ21471.1	Phospholipase B-like 2	0	0	Pfam:Phospholip_B	2.4e-176
Lipase	AB hydrolase	c52646_g1_i1	XP_028513084.1	Gastric triacylglycerol lipase	0	0	Pfam: Abhydrolase_1	1e-20
Lipase	AB hydrolase	c55380_g1_i1	XP_020909772.1	Gastric triacylglycerol lipase	0	0	Pfam: Abhydrolase_1	4.7e-20
Lipase	Type B carboxylesterase	c55508_g1_i2	KXJ28348.1	Acetylcholinesterase	0	0	Pfam: COesterase	2.7e-136
Lipase	Phospholipase A2	c56806_g1_i1	XP_031552196.1	Phospholipase A2	3e-19	7	PA2c	3.66e-27
Lipase	Phospholipase A2	c56939_g1_i1	XP_020914887.1	Phospholipase A2	3e-15	0	Pfam:Phospholip_A2_2	1.3e-10
Lipase	Phospholipase A2	c57583_g1_i1	XP_020910776.1	Phospholipase A2	5e-60	0	PA2c	6.55e-38
Lipase	Phospholipase B	c58162_g1_i2	XP_020904124.1	Phospholipase B-like 1	0	0	Pfam:Phospholip_B	5.2e-185
Lipase	Phospholipase A2	c58430_g1_i1	XP_020914887.1	Phospholipase A2	1e-86	0	Pfam:Phospholip_A2_2	1.6e-34
Lipase	Phospholipase A2	c61733_g1_i1	XP_020911062.1	Phospholipase A2	2e-22	0	PA2c	4.83e-27
Lipase	Phospholipase A2	c62673_g1_i1	Q8WS88.1	Phospholipase A2	1e-75	0	PA2c	4.11e-21
Lipase	Phospholipase A2	c63286_g5_i1	XP_020902707.1	Acidic phospholipase A2 natratoxin	7e-31	0	PA2c	2.08e-31
Lipase	Phospholipase A2	c63420_g1_i1	XP_020902715.1	Basic phospholipase A2 pseudexin A chain	5e-24	0	PA2c	6.07e-33
Lipase	Phospholipase A2	c6503_g1_i1	XP_020900455.1	Phospholipase A2	8e-49	0	PA2c	1.05e-18
Metalloprotease	Peptidase M12A	c26461_g1_i1	KXJ06057.1	Zinc metalloproteinase nas-15	0	7	ZnMc | 2x TSP1 | MAM	2.1e-39 | 3.9e-7 | 2.32e-14 | 6.42e-27
Metalloprotease	Peptidase M12A	c45607_g1_i1	XP_031566063.1	Zinc metalloproteinase nas-6-like isoform	0	0	ZnMc | 2x ShKT | FA58C	5.41e-42 | 9.93E-5 | 2.79E-8 | 2.39E-20
Metalloprotease	Peptidase M12A	c49341_g1_i3	KXJ29032.1	Meprin A subunit beta	0	0	ZnMc | TSP1 | MAM	1.37E-43 | 5.1E-11 | 8.24E-48
Metalloprotease	Peptidase M12A	c49341_g1_i3	KXJ29032.1	Meprin A subunit beta	0	4	ZnMc | 2x TSP1 | MAM | PFAM: WSC	1.37e-43 | 5.56e-3 | 5.1e-11 | 8.24e-48 | 1.8e-4
Metalloprotease	Peptidase M12A	c49481_g1_i2	XP_031571902.1	Zinc metalloproteinase nas-4	2e-161	0	ZnMc	2.1e-48
Metalloprotease	Peptidase M12A	c50529_g1_i1	XP_020904350.1	Zinc metalloproteinase nas-4	1e-129	0	ZnMc | ShKT	2.37E-47 | 9.41E-6
Metalloprotease	Peptidase M12A	c53470_g1_i1	XP_020906559.1	Blastula protease 10	2e-151	0	ZnMc	3.48e-54
Metalloprotease	Peptidase M12A	c54010_g1_i1	XP_020891862.1	uncharacterized protein	0	0	ZnMc | TSP1	1.51e-40 | 2.63E-13
Metalloprotease	Peptidase M12A	c54207_g1_i1	XP_031573188.1	Meprin A subunit beta	4e-125	0	ZnMc	2.92e-47
Metalloprotease	Peptidase M12A	c56135_g1_i1	XP_031568761.1	MAM and LDL-receptor class A domain-containing protein	0	0	ZnMc | TSP1 | MAM	3.78e-32 | 1.01e-14 | 6.19e-52
Metalloprotease	Peptidase M12A	c56734_g1_i4	XP_020893266.1	uncharacterized protein	2e-131	0	ZnMc	1.05e-48
Metalloprotease	Peptidase M12A	c57901_g1_i1	XP_031571615.1	Zinc metalloproteinase nas-4-like isoform	5e-135	0	ZnMc	1.31e-40
Metalloprotease	Disintegrin and Metalloproteinase	c59360_g1_i1	XP_031559226.1	A disintegrin and metalloproteinase with thrombospondin motifs 6-like	0	16	PFAM: Pep_M12B_propep | PFAM: Reprolysin | ACR | TSP1 | PFAM: ADAM_spacer1 | 3x TSP1	1.5e-19 | 4.1e-17 | 2e-4 | 7.85e-12 | 1.6e-10 | 3.19e-2 | 4.52e-3 | 3.92e-2
Metalloprotease	Peptidase M12A	c59865_g1_i1	XP_031559878.1	Tolloid-like protein	0	0	ZnMc | 5x CUB | 2x EGF_CA	8.44e-53 | 6.55e-38 | 5.74e-43 | 1.56e-7 | 6.6e-43 | 3.01e-9 | 9.86e-33 | 6.87e-32
Metalloprotease	Peptidase M12A	c60421_g2_i1	XP_020914948.1	Zinc metalloproteinase nas-13	0	0	ZnMc | ShKT | FA58C	1.93e-47 | 1.1E-6 | 3.27e-18
Metalloprotease	Peptidase M12A	c60589_g1_i1	XP_031574920.1	uncharacterized protein	0	0	ZnMc | 2x TSP_1 | 2x CUB | CLECT	5.16e-48 | 5.42e-15 | 4.17e-16 | 5.49e-40 | 2.52e-39 | 7.77e-31
Metalloprotease	Peptidase M12A	c61315_g2_i1	XP_020908967.2	uncharacterized protein	0	0	2x ZnMc	1.59e-39 | 9.51E-38
Metalloprotease	Peptidase M12A	c61327_g1_i4	XP_031565641.1	uncharacterized protein	0	0	ZnMc | TSP1 | MAM | 3x ShK	3.69e-35 | 2.59e-12 | 4.02e-19 | 9.41E-6 | 1.11e-7 | 4.1E-6
Metalloprotease	Disintegrin and Metalloproteinase	c62072_g1_i1	KXJ25151.1	A disintegrin and metalloproteinase with thrombospondin motifs 6	0	10	PFAM: Pep_M12B_propep | PFAM: Reprolysin | ACR | TSP1 | PFAM: ADAM_spacer1 | 3x TSP1	2.3e-21 | 2.9e-12 | 3.26e-2 | 3.61e-11 | 3.9e-7 | 8.11e-5 | 4.28e-4 | 1.15e-4
Metalloprotease	Peptidase M12A	c62461_g1_i1	XP_020900616.2	uncharacterized protein	0	0	ZnMc | 2x TSP1 | MAM	2.1e-39 | 3.9e-7 | 2.32e-14 | 6.42e-27
Metalloprotease	Peptidase M12A	c65095_g1_i1	XP_020913508.1	Tolloid-like protein	0	0	ZnMc | 4x CUB | 3x EGF_CA	4.13e-47 | 4.08e-16 | 3.57e-30 | 6.98E-4 | 4.43E-35 | 2.68E-6 | 2.76E-8 | 2.96E-8
Metalloprotease	Peptidase M12A	c65095_g1_i4	XP_020913508.1	Tolloid-like protein	6e-62	0	ZnMc	1.94e-43
Metalloprotease	Peptidase M12A	c65859_g3_i2	XP_031556843.1	Zinc metalloproteinase nas-4	1e-110	0	ZnMc	1.9e-37
Metalloprotease	Peptidase M12A	c65937_g1_i2	XP_020910086.1	Zinc metalloproteinase nas-4	1e-173	0	ZnMc | FA58C	2.73E-29 | 1.36E-15
N/A	EGF	c62653_g1_i6	XP_040202200.1	Neurogenic locus notch homolog protein	1e-30	0	EGF | 2x EGF_CA	7.35E-4 | 2.28E-9 | 1.28E-12
Neurotoxin	Cysteine-rich venom protein opanin	c112435_g1_i1	XP_020622456.1	Ectin	5e-32	0	SCP	4.78e-25
Neurotoxin	Cysteine-rich venom protein opanin	c44255_g1_i1	XP_031569962.1	Ectin	7e-55	0	SCP	4.83e-12
Neurotoxin	Cysteine-rich venom protein opanin	c58442_g1_i1	XP_020910722.1	Ectin	8e-58	0	3x ShK | SCP	7.64E-6 | 3.76E-5 | 2.13E-4 | 4.52E-35
Neurotoxin	Cysteine-rich venom protein opanin	c59195_g1_i1	XP_031559463.1	Ectin	7e-114	0	1x ShK | SCP	1.64E-5 | 4.39E-33
Neurotoxin	NaTx	c40761_g1_i1	2006280B	Calitoxin	4e-23	4	PFAM: Toxin_4	1.4e-12
Peptidase	Peptidase M13	c60634_g1_i1	XP_031554434.1	Endothelin-converting enzyme	0	0	2x peptidase M13	6.5e-72 | 2.5e-69
Peptidase	Peptidase M13	c62290_g1_i2	XP_020897178.1	Neprilysin-1 isoform	0	0	2x peptidase M13	3.3e-69 | 2.8E-61
Peptidase	Peptidase M13	c63393_g1_i1	KXJ11796.1	Endothelin-converting enzyme	0	13	2x peptidase M13	5.7e-96 | 4.8E-59
Peptidase S1	Trypsin serine protease	c35451_g1_i1	XP_031571312.1	Chymotrypsin-like elastase family member	2e-134	0	Tryp_SPc	5.65e-83
Peptidase S1	Trypsin serine protease	c37991_g1_i1	XP_020894948.2	Transmembrane protease serine	1e-161	0	Tryp_SPc	2.13e-78
Peptidase S1	Trypsin serine protease	c49461_g1_i1	XP_031571313.1	Chymotrypsinogen B	8e-139	0	Tryp_SPc	1.03e-85
Peptidase S1	Trypsin serine protease	c50451_g1_i1	XP_020913614.1	Trypsin-1	5e-136	0	Tryp_SPc	1.04e-81
Peptidase S1	Trypsin serine protease	c52359_g1_i1	KXJ17491.1	Serine protease hepsin	6e-143	0	Tryp_SPc	1.69e-81
Peptidase S1	Trypsin serine protease	c54311_g1_i1	XP_031552036.1	Transmembrane protease serine	4e-114	0	Tryp_SPc	3.79e-84
Peptidase S1	Trypsin serine protease	c55159_g1_i1	XP_031573700.1	CUB and peptidase domain-containing protein	8e-118	0	Tryp_SPc	2.97e-100
Peptidase S1	Trypsin serine protease	c56193_g1_i1	XP_028513970.1	Transmembrane protease serine	1e-168	0	Tryp_SPc	9.99e-84
Peptidase S1	Trypsin serine protease	c57055_g1_i1	XP_031550564.1	Chymotrypsinogen B	1e-127	0	Tryp_SPc	1.57e-90
Peptidase S1	Trypsin serine protease	c60161_g1_i4	XP_020907044.1	Chymotrypsinogen B	2e-156	0	Tryp_SPc	3.73e-83
Peptidase S1	Trypsin serine protease	c62725_g1_i1	XP_020898191.1	Chymotrypsinogen B	1e-132	0	Tryp_SPc	5.07e-85
Peptidase S1	Trypsin serine protease	c64299_g2_i3	XP_020912074.1	Transmembrane protease serine	5e-143	0	Tryp_SPc	3.7e-87
Poreforming	Hydrolase 18	c48930_g1_i1	XP_020902061.1	Acidic mammalian chitinase	0	0	Glyco_18	8.86e-133
Poreforming	Hydrolase 18	c54066_g1_i1	KXJ28479.1	Acidic mammalian chitinase	0	0	Glyco_18	8.58e-140
Poreforming	Jellyfish type II	c60596_g1_i1	XP_031561293.1	uncharacterized protein	3e-96	4	N/A
Potassium channel toxin	Type II (venom kunitz)	c20575_g1_i1	A8Y7P5.1	Kunitz-type serine protease inhibitor B5	9e-15	0	KU	6.04e-23
Potassium channel toxin	Type I (ShK)	c32422_g1_i1	Not significant	uncharacterized protein	9e-09	4	2x Pfam: ShK	0.19 | 0.014
Potassium channel toxin	Type II (venom kunitz)	c42918_g1_i1	XP_028517843.1	KappaPI-actitoxin-Avd3b	3e-07	0	KU	7.52e-05
Potassium channel toxin	Type I (ShK)	c48176_g1_i1	Not significant			0	ShK	0.089
Potassium channel toxin	Type I (ShK)	c50551_g1_i1	Not significant	uncharacterized protein	3e-13	3	2x Pfam: ShK	0.0063 | 0.97
Potassium channel toxin	Type I (ShK)	c52694_g1_i1	Not significant			0	ShK	0.00783
Potassium channel toxin	Type II (venom kunitz)	c53389_g1_i2	XP_020905524.1	Thyroglobulin	1e-55	0	KU | TY	1.1e-25 | 2.49E-5 | 1.36E-6
Potassium channel toxin	Kazal	c53974_g1_i1	Not significant			0	4x Kazal	6.45e-8 | 1.54e-14 | 5.07e-15 | 1.2e-7
Potassium channel toxin	Kazal	c54065_g1_i1	XP_031569839.1	follistatin-related protein 1-like	5e-103	0	Kazal	3.78e-14
Potassium channel toxin	Type II (venom kunitz)	c54833_g1_i1	GFY51441.1	Kunitz-type serine protease inhibitor	1e-39	0	2x KU	1.62e-23 | 3.11e-25
Potassium channel toxin	Type II (venom kunitz)	c55600_g1_i1	XP_020892696.1	uncharacterized protein	2e-149	0	CUB | KU	2.04e-16 | 8.54e-23
Potassium channel toxin	Type II (venom kunitz)	c55847_g1_i3	XP_015752579.1	PREDICTED: trans-Golgi network integral membrane protein 2-like isoform	3e-30	0	KU	1.59e-22
Potassium channel toxin	Kazal	c56014_g1_i1	Not significant			0	Kazal	3.48e-13
Potassium channel toxin	Type II (venom kunitz)	c60005_g1_i3	XP_043200236.1	Protease inhibitors	4e-88	0	5x KU	2.17e-24 | 1.1e-7 | 7.73e-21 | 1.85e-18 | 1.04e-17
Potassium channel toxin	Type II (venom kunitz)	c60135_g1_i1	XP_031574707.1	CUB and sushi domain-containing protein	0	0	6x CCP | Kazal | KU	< 2.01E-6 | 6.59E-14|4.69E-20
Potassium channel toxin	Type II (venom kunitz)	c7776_g1_i1	P0DN15.1	U-actitoxin-Avd3n	1e-19	0	KU	8.41e-22
Potassium channel toxin	Type III	c8939_g1_i1	ALL34535.1	Type III potassium channel toxin protein	6e-06	2	N/A
Protease	Cystatin	c28774_g1_i1	XP_020897050.1	Cathepsin L	0	0	CY | Inhibitor I29 | Pept_C1	3.93E-18 | 1.38E-13 | 2.68E-100
Protease	Multicopper oxidase	c42414_g1_i1	XP_028516040.1	Lactadherin	5e-78	0	FA58C	1.64e-32
Protease	Multicopper oxidase	c54817_g1_i1	XP_020912655.1	uncharacterized protein	5e-178	0	FA58C	1.8e-06
Protease	Multicopper oxidase	c56399_g1_i1	XP_020903774.1	Epithelial discoidin domain-containing receptor 1 isoform	0	0	FA58C	1.32e-13
Protease	Multicopper oxidase	c56947_g1_i1	XP_028512984.1	Venom prothrombin activator oscutarin-C non-catalytic subunit isoform	2e-79	5	FA58C	1.59e-30
Sodium channel toxin	Sea anemone sodium channel toxin	c40761_g1_i1	P49127.1	Calitoxin	5e-24	0	Toxin_4	1.4e-12
Sodium channel toxin	Type I	c50240_g1_i1	ATY39980.1	Delta-actitoxin-Nan sodium channel inhibitory toxin	2e-12	5	N/A
Structural class peptide	Sea anemone type 8	c124144_g1_i1	XP_031549483.1	U-actitoxin-Avd8d-like	2e-06	0	N/A
Structural class peptide	Sea anemone type 8	c1250_g1_i1	XP_020894247.1	U-actitoxin-Avd8e	6e-10	0	N/A
Structural class peptide	Unknown	c44161_g1_i1	XP_031562063.1	uncharacterized protein	6e-17	7	N/A
Structural class peptide	Sea anemone type 9	c44591_g1_i1	P0DMZ8.1	RecName: Full=U-actitoxin-Avd13a/b	6e-09	0	N/A
Structural class peptide	Sea anemone type 8	c47095_g1_i1	ATY39983.1	U-actitoxin-Nan8a	9e-34	2	N/A
Structural class peptide	Sea anemone type 8	c49869_g1_i1	XP_020894247.1	U-actitoxin-Avd8e	8e-15	0	N/A
Structural class peptide	Sea anemone type 8	c50253_g1_i1	XP_031551814.1	U-actitoxin-Avd8d-like	6e-10	0	N/A
Structural class peptide	Unknown	c56815_g1_i2	XP_027044931.1	uncharacterized protein	3e-29	6	N/A
Structural class peptide	Sea anemone type 8	c6665_g1_i1	ATY39983.1	U-actitoxin-Nan8a	1e-19	0	N/A
Unknown	VP302	c32582_g1_i2	XP_023234363.1	Venom protein 302	6e-11	0	IB	1e-10
Unknown	Unknown	c44255_g1_i1	XP_031569962.1	ectin-like	7e-55	1	SCP (CRISP)	4.83e-12
Unknown	VP302	c50444_g1_i1	KXJ12747.1	Venom protein 302	9e-115	0	IB | Kazal | KU	5e-7 | 1.27E-6 | 8.36E-17
Unknown	VP302	c51352_g1_i1	API81350.1	Venom toxin	5e-12	0	IB	1e-10
Unknown	VP302	c54521_g1_i1	XP_045601889.1	Venom protein 302	3e-11	0	IB	7e-12
Unknown	Unknown	c58770_g1_i1	XP_028516671.1	Ovotransferrin	5e-132	15	TR_FER	1.12e-95
Unknown	Cephalotoxin	c66541_g1_i1	XP_031568134.1	SE-cephalotoxin	0	0	Blast: CCP | LDLa	2E-6 | 6.53E-9
Unknown	VP302	c79440_g1_i1	XP_028654658.1	Cysteine-rich motor neuron 1 protein	0.0002	0	IB	4e-06

## Sheet: Calliactis Discoveries
Toxin Family	Contig	Peptide Hits (Conf ≥95)	Sequence coverage (%)	Mature Protein coverage (%)	Blast Accession	Blast Decriptor	Blast e-value	SMART Hit	SMART e-value
Disintegrin and Metalloproteinase	c59360_g1_i1	15	14.6898	14.9628	XP_031559226.1	A disintegrin and metalloproteinase with thrombospondin motifs 6-like	0	PFAM: Pep_M12B_propep | PFAM: Reprolysin | ACR | TSP1 | PFAM: ADAM_spacer1 | 3x TSP1	1.5e-19 | 4.1e-17 | 2e-4 | 7.85e-12 | 1.6e-10 | 3.19e-2 | 4.52e-3 | 3.92e-2
Disintegrin and Metalloproteinase	c62072_g1_i1	10	13.0719	13.3971	KXJ25151.1	A disintegrin and metalloproteinase with thrombospondin motifs 6	0	PFAM: Pep_M12B_propep | PFAM: Reprolysin | ACR | TSP1 | PFAM: ADAM_spacer1 | 3x TSP1	2.3e-21 | 2.9e-12 | 3.26e-2 | 3.61e-11 | 3.9e-7 | 8.11e-5 | 4.28e-4 | 1.15e-4
Ficolin-type lectin	c60639_g1_i1	3	10.4167	11.1111	XP_031556939.1	Fibrinogen C domain-containing protein	8e-108	FBG	1.5e-113
Jellyfish type II	c60596_g1_i1	4	7.5969	7.82748	XP_031561293.1	uncharacterized protein	3e-96	N/A
KTx type I (ShK)	c32422_g1_i1	4	46.5909	59.4203	Not significant	uncharacterized protein	9e-09	2x Pfam: ShK	0.19 | 0.014
KTx type I (ShK)	c50551_g1_i1	3	42.1569	52.439	Not significant	uncharacterized protein	3e-13	2x Pfam: ShK	0.0063 | 0.97
KTx type III	c8939_g1_i1	2	26.8293	46.8085	ALL34535.1	Type III potassium channel toxin protein	6e-06	N/A
Multicopper oxidase	c56947_g1_i1	5	21.8045	23.3871	XP_028512984.1	Venom prothrombin activator oscutarin-C non-catalytic subunit isoform	2e-79	FA58C	1.59e-30
NaTx	c40761_g1_i1	4	52.1739	91.6667	2006280B	Calitoxin	4e-23	PFAM: Toxin_4	1.4e-12	91% coverage for expected mature protein
NaTx type I	c50240_g1_i1	5	57.8947	100	ATY39980.1	Delta-actitoxin-Nan sodium channel inhibitory toxin	2e-12	N/A		100% coverage for expected mature protein
Peptidase M12A	c26461_g1_i1	7	11.9741	12.3953	KXJ06057.1	Zinc metalloproteinase nas-15	0	ZnMc | 2x TSP1 | MAM	2.1e-39 | 3.9e-7 | 2.32e-14 | 6.42e-27
Peptidase M12A	c49341_g1_i3	4	2.47295	2.54777	KXJ29032.1	Meprin A subunit beta	0	ZnMc | 2x TSP1 | MAM | PFAM: WSC	1.37e-43 | 5.56e-3 | 5.1e-11 | 8.24e-48 | 1.8e-4
Peptidase M13	c63393_g1_i1	13	5.83419	5.98739	KXJ11796.1	Endothelin-converting enzyme	0	2x peptidase M13	5.7e-96 | 4.8E-59
Phospholipase A2	c56806_g1_i1	7	49.3827	57.1429	XP_031552196.1	Phospholipase A2	3e-19	PA2c	3.66e-27
Sea anemone type 8	c47095_g1_i1	2	24.3902	31.746	ATY39983.1	U-actitoxin-Nan8a	9e-34	N/A
Unknown	c44161_g1_i1	7	51.2195	59.434	XP_031562063.1	uncharacterized protein	6e-17	N/A		59% coverage for expected mature protein
Unknown	c56815_g1_i2	6	37.6543	42.6573	XP_027044931.1	uncharacterized protein [likely Trifoil/Structural]	3e-29	N/A
Unknown	c58770_g1_i1	17	47.6064	50.565	XP_028516671.1	Ovotransferrin	5e-132	TR_FER	1.12e-95
	Known toxin
	Sea anemone putative toxin
	Candidate toxin
Lower quality (<3 peptides / <20% coverage)
Unknown	c44255_g1_i1	1	11.4		XP_031569962.1	ectin-like	7e-55	SCP (CRISP)	4.83e-12

## Sheet: MS Matches
*ONLY present in pooled DDA data		*Missed or premature cleavage
Contig	Toxin Family	Peptide Match (Conf ≥95)	Peptide Match (Conf ≥60) [Conf]	Sequence
c8939_g1_i1	KTx Type III	R.ILIADCPEFWGR.C		MKSLFAFLLLLVFCIAMVTAWNDWDDADSTANAKRGIDCTCKGKSGTYWWTLDRCHRPAAGRILIADCPEFWGRCCVYGRKS
		K.SGTYWWTLDR.C
c26461_g1_i1	Metalloproteinase	R.NYITFDQSDGCSSR.I	K.NKPGTQIQWAR.H [86.1]	MSVRIFLLLAILVHCRVSTLGKPMFDIEAVKDVNTEENYVEDPEIEEIAKREYETVHGQILAVNMAHWEKRKMKMRDEEENSTNVFESIEKDNDRHHLNLYQGDIKMDEDLENYLHMPVRSRTKRNAQRTRTRLWTSRIIPYTVPSFMQKIRKNLMIAIGEYHKYTCLRFVPYKPSVHRNYITFDQSDGCSSRIGKKYFAPGRQTVSIGPGCNYPGTIIHELLHALGFFHEQARSDRDKYVEIKWENILRGFDDQFEKYDWRDIDQLGQSYDFESIMHYDRKAFSKNNQPTIVAIGNENQRFGTKDKRLSKMDIIEINALYDCKVKQYGWTKWSEFTPCNAKCYRIRERYCFHPGNLKYCGGKVNNYGIEKDERKCTKLECLARNAINGHWGHWSSWTD…
		K.VNNYGIEK.D	R.GFDDQFEK.Y [81.7]
		K.DVELCSVNR.C	R.NYITFDQSDGCSSR.I [75.6]
		K.KGDQGPTWHLATGTLDIK.G	K.FYYTMYGK.T [65.4]
		R.CSKDFEDTDFDDR.K	K.LISPLLK.S [63.2]
		M.DIIEINALYDCK.V
c32422_g1_i1	KTx Type I (ShK)	LEADLLSHESCR.Y	K.DVLSEFSCGVLKK.D [69.6]	MKTTLVVVVLACIVALTSALEADLLSHESCRYISSNRYCGHDYMDKLCNTTCNCKDVLSEFSCGVLKKDGQCNKADIQAKCKLTCDKC
		K.LCNTTCNCK.D
		K.DVLSEFSCGVLK.K
		K.CKLTCDKC
c40761_g1_i1	NaTx	K.CNSISVFADCCHKKPT	K.CNSISVFADCCHK.K [92.3]	MKTQVLVVLVLCVVFCLAESRNSMTSEERGLVSLMRQRDDIAKRLQCKCKGDAPDLSHMSGTIYFSCEGGDNSWKKCNSISVFADCCHKKPT
		K.CKGDAPDLSHMSGTIYFSCEGGDNSWK.K	K.CKGDAPDLSHMSGTIYFSCEGGDNSWKK.C [91.0]
		K.CKGDAPDLSHMSGTIYFSCEGGDNSWKK.C	K.CNSISVFADCCHKKPT [81.5]
c44161_g1_i1	Unknown	K.ESPLCSLMEER.L	R.EMSSYASMYCK.S [92.7]	MMSALFLVLSVSLLVSGLQGIGEATSEIKESPLCSLMEERLPDLCEVQVKIDPHYCQDHFSSCPRTCLRCKRPQKPPAPPRECKDLRTDCPRAMHSYGMDICREMSSYASMYCKSYCKLCNKR
		R.LPDLCEVQVK.I	K.ESPLCSLMEERLPDLCEVQVK.I [86.4]
		K.IDPHYCQDHFSSCPR.T	A.TSEIKESPLCSLMEER.L [81.0]
		R.AMHSYGMDICR.E	R.AMHSYGMDICR.E [75.9]
		R.EMSSYASMYCK.S
		A.TSEIKESPLCSLMEER.L
		A.TSEIKESPLCSLMEERLPDLCEVQVK.I
c47095_g1_i1	Sea anemone toxin 8	K.FNICGELVSR.K	F.NICGELVSR.K [64.8]	MKYLAIVFVALIGVVAISASHEEDLYELVREFANDANPRAGRCANRFKFNICGELVSRKQCAQGSRMGKFARQHCQFMCGLC
		R.QHCQFMCGLC
c49341_g1_i3	Metalloproteinase	K.VGFTDLDIR.E	K.TNENQWIVFVHK.K [75.6]	MDCFLLVLLVFSMLTYSVAVPIEDGKRLAVEENVHEKIYKVNKKDDLNLYEGDIIITSQHKGPADLRNTGDVNSKRNAVRDRKRLWLQKVVPYEFGYGFPAAYQETVLAAIKEYHSKTCIRFKPKTNENQWIVFVHKKGCWSAVGRSYWLDGAGQEVSLGEGCNNIGTILHEIMHALGFWHEQSRPDRNQYVEVLWENIIEGESYNFNKYSHGVVDTLKVPYDFQSIMHYGTKSFTKNGQPTIRAIRTPGRDLGQKVGFTDLDIRELNSLYDCKQSDSPWSSWSDFGPCSLSDCNKYRQRFCISNNPNTDCPGADYYGVQTDILKCSDAECFAPIDGHWSRWSGWSPCSASCSYGTQTRTRICDDPKPQFNGKNCVGNSTQGRQCKIKTCGLDPDDCEF…
		K.LGQMTISSK.V	K.SYANFVYK.I [70.1]	MDCFLLVLLVFSMLTYSVAVPIEDGKRLAVEENVHEKIYKVNKKDDLNLYEGDIIITSQHKGPADLRNTGDVNSKRNAVRDRKRLWLQKVVPYEFGYGFPAAYQETVLAAIKEYHSKTCIRFKPKTNENQWIVFVHKKGCWSAVGRSYWLDGAGQEVSLGEGCNNIGTILHEIMHALGFWHEQSRPDRNQYVEVLWENIIEGESYNFNKYSHGVVDTLKVPYDFQSIMHYGTKSFTKNGQPTIRAIRTPGRDLGQKVGFTDLDIRELNSLYDCKQSDSPWSSWSDFGPCSLSDCNKYRQRFCISNNPNTDCPGADYYGVQTDILKCSDAECFAPIDGHWSRWSGWSPCSASCSYGTQTRTRICDDPKPQFNGKNCVGNSTQGRQCKIKTCGLDPDDCEF…
		K.INWFDL.RK		MDCFLLVLLVFSMLTYSVAVPIEDGKRLAVEENVHEKIYKVNKKDDLNLYEGDIIITSQHKGPADLRNTGDVNSKRNAVRDRKRLWLQKVVPYEFGYGFPAAYQETVLAAIKEYHSKTCIRFKPKTNENQWIVFVHKKGCWSAVGRSYWLDGAGQEVSLGEGCNNIGTILHEIMHALGFWHEQSRPDRNQYVEVLWENIIEGESYNFNKYSHGVVDTLKVPYDFQSIMHYGTKSFTKNGQPTIRAIRTPGRDLGQKVGFTDLDIRELNSLYDCKQSDSPWSSWSDFGPCSLSDCNKYRQRFCISNNPNTDCPGADYYGVQTDILKCSDAECFAPIDGHWSRWSGWSPCSASCSYGTQTRTRICDDPKPQFNGKNCVGNSTQGRQCKIKTCGLDPDDCEF…
		N.TDCPGADYYGVQTDILK.C		MDCFLLVLLVFSMLTYSVAVPIEDGKRLAVEENVHEKIYKVNKKDDLNLYEGDIIITSQHKGPADLRNTGDVNSKRNAVRDRKRLWLQKVVPYEFGYGFPAAYQETVLAAIKEYHSKTCIRFKPKTNENQWIVFVHKKGCWSAVGRSYWLDGAGQEVSLGEGCNNIGTILHEIMHALGFWHEQSRPDRNQYVEVLWENIIEGESYNFNKYSHGVVDTLKVPYDFQSIMHYGTKSFTKNGQPTIRAIRTPGRDLGQKVGFTDLDIRELNSLYDCKQSDSPWSSWSDFGPCSLSDCNKYRQRFCISNNPNTDCPGADYYGVQTDILKCSDAECFAPIDGHWSRWSGWSPCSASCSYGTQTRTRICDDPKPQFNGKNCVGNSTQGRQCKIKTCGLDPDDCEF…
				MDCFLLVLLVFSMLTYSVAVPIEDGKRLAVEENVHEKIYKVNKKDDLNLYEGDIIITSQHKGPADLRNTGDVNSKRNAVRDRKRLWLQKVVPYEFGYGFPAAYQETVLAAIKEYHSKTCIRFKPKTNENQWIVFVHKKGCWSAVGRSYWLDGAGQEVSLGEGCNNIGTILHEIMHALGFWHEQSRPDRNQYVEVLWENIIEGESYNFNKYSHGVVDTLKVPYDFQSIMHYGTKSFTKNGQPTIRAIRTPGRDLGQKVGFTDLDIRELNSLYDCKQSDSPWSSWSDFGPCSLSDCNKYRQRFCISNNPNTDCPGADYYGVQTDILKCSDAECFAPIDGHWSRWSGWSPCSASCSYGTQTRTRICDDPKPQFNGKNCVGNSTQGRQCKIKTCGLDPDDCEF…
c50240_g1_i1	NaTx Type I	R.NGKGCTCNDGTTTGIFWAGSCPGGWSYCK.T	K.TMWYWVVPGECCTQK [72.9, 69.8]	MNRMLIIFVVVTVFGLASGLGPNMPAPDLAKRNGKGCTCNDGTTTGIFWAGSCPGGWSYCKTMWYWVVPGECCTQK*
		K.GCTCNDGTTTGIFWAGSCPGGWSYCK.T	R.NGKGCTCNDGTTTGIF.W [72.5]
		K.TMWYWVVPGECCTQ.K	G.SCPGGWSYCK.T [64.5]
c50551_g1_i1	KTx Type I (ShK)	K.CSAYHANDECWTENAR.K		MKIALLAVICVLLVVKDTEGRRMCRDKAPKSKCSAYHANDECWTENARKNCQRTCESCGSECYDADPKCQREDIKADLCPTKDMIGAAYLMCPRSCGLCIDE
		R.TCESCGSECYDADPK.C
		K.DMIGAAYLMCPR.S
c56806_g1_i1	Phospholipase A2	R.NFAQFAAMTYHTTHR.W	K.KYVGYGCYCGLGGY.G [89.3]	MKVLQMFFCVILLCVTSVLVEAKSTTKGDETASKRNFAQFAAMTYHTTHRWPKKYVGYGCYCGLGGYGIPVDPIDECCKTHDACYKKVEDSGICSYSWAIYLTIYKRKGGAECSEDNEKCQMEVCKCDSVAAKCLGKYKDIFNEKYAGYDKKGKCDPSFTLS*
		K.YVGYGCYCGLGGYGIPVDPIDECCK.T	K.KYVGYGCYCGLGGYGIPVDPIDECCK.T [67.8]
		K.CQMEVCKCDSVAAK.C	K.YKDIFNEKY.A [64.8]
		K.CQMEVCK.C
		K.YKDIFNEK.Y
		K.YAGYDKK.G
		K.GKCDPSFTLS
c56815_g1_i2	Unknown	R.IWISGVNYIEPAK.T	R.FQVIPQSDGTLAFK.A [86.8]	MKFVFALFMLACTVAIIEGLGCGCGEKLRLKADNNKYWSRIWISGVNYIEPAKTELDVHSHFTVYNTDREGTVLLKADNGMYVSRIHRNGIDYIEAAKSSPDVHCRFQVIPQSDGTLAFKADNGKYLSRIYRLNTGRNTIEAAKSSIDQYCKFKPSFQCPAQ
		K.ADNGMYVSR.I	G.LGCGCGEK.L [74.6]
		R.IHRNGIDYIEAAK.S	K.TELDVHSHFTVYNTDR.E [63.1]
		K.SSPDVHCR.F
		K.SSIDQYCK.F
		K.FKPSFQCPAQ
c56947_g1_i1	FA58C	K.NRYLSVMPTLQK.L	K.VMSVSGIATQGR.G [69.6]	MKLILILALSLATEVIMAEPQRQASQSDNVEKRATENKDLLSHISCRYLKKNRYLSVMPTLQKLCNKTFACNDVLSHKSCNILEASGACTKDSSLSEKYCKFTCDNCGTTEIKESSSKCEKPLGMESGAIPDSSISASSFYGRDFRPAIARLHHNNIGWSARSNAVGQWIQVDLGKVMSVSGIATQGRGQETPPNGQWVTSYILQYSGDGKAFKGYQGGKIFQGNTDTNKVVKHELVPPLVGRYIRLLPKTWHAWITLRMELYGLC
		K.TFACNDVLSHK.S
		K.SCNILEASGACTK.D
		K.FTCDNCGTTEIK.E
		K.HELVPPLVGR.Y
c58770_g1_i1	Unknown	K.GNEADFITLDTGK.V	R.WCTVNNNEK.A [94.5]	MLWIPALVCAASLVAIVEPAKQFRWCTVNNNEKAKCADFVKGLQVVSNLTNLAIDPSCVAGNDDVDCMKKIKGNEADFITLDTGKVYTAGKDYGLVPIAYEETETGYKGYYAVAVAKKDTSVTLKTLKGKKTCHTGYRRTSGWNMPVGYFLNQMNDFRQCGNPSDAASASKYFGQSCVPGAPAGFDNLCSLCKTKTCDKTDGYSGYHGAFNCTMDGVGDVAFVKHLTTAEVVGSSMTKDYKYLCTDGSSKVVTANSHVNCNFGFSPSHTVVARSGDNTDYVKILTKAAESCQANTSSCGGFEIFSSSKYGGKNLLFKDSTKKLLSVGDKNTYQKWLGEYSKSLDALYKSDPCSSSVIITSCYGLVVAMFVLVKAIL
		K.DYGLVPIAYEETETGYK.G	R.SGDNTDYVK.I [93.0]
		K.GYYAVAVAK.K	K.YFGQSCVPGAPAGFDNLCSLCK.T [91.5]
		R.TSGWNMPVGYFLNQMNDFR.Q	K.VVTANSHVNCNFGFSPSHTVVAR.S [91.0]
		R.QCGNPSDAASASK.Y	K.YLCTDGSSK.V [86.0]
		K.YFGQSCVPGAPAGFDNLCSLCK.T	K.GNEADFITLDTGK.V [82.8]
		K.HLTTAEVVGSSMTK.D	R.TSGWNMPVGY.F [66.3]
		K.VVTANSHVNCNFGFSPSHTVVAR.S	K.SLDALYK.S [63.0]
		R.SGDNTDYVKILTK.A
		K.LLSVGDKNTYQK.W
		K.WLGEYSK.S
		K.KIKGNEADFITLDTGK.V
		K.IKGNEADFITLDTGK.V
		Y.FLNQMNDFR.Q
		K.YGGKNLLFK.D
		K.NLLFKDSTK.K
		K.KLLSVGDKNTYQK.W
c59360_g1_i1	Disintegrin and Metalloproteinase	K.VLVETHHR.N	R.DNPDKIVDVPAGSSNVK.A [94.2]	MAFMYPTFICILAVATFSEAKLTETQFEHKLHHRMTKRELQTFFGVDSHDKVPEYDVTMPYQGHPHSGDFATYKLNKHARHRRSTEPNVWYYNIQALGLNLNLNLSRTRNVIGPKVLVETHHRNGSISYSPQSDLNILEGHVDTEPSSFAVINNNRGLTGMISLLDQLLFIHPLPTHLAKHHGKQNGGGQLHVVHRHPSNDATNERRSCHMDDSKVKRSSRSRRSVDEHAQSSSNKVMELALIADKGVVEHKGDDHEVVEFLSMVAHIIEGLFRDSSIGDRKLHLEVVKIALDKENKLNYTNKASNRHKLDKLSEWGVRNIVLDNGKHGHADILVLISRSGSGGLALGSSTCKSQFGLTVSTDIGLATALIAAHEIAHSLGIGHDGGKPECPDHVYLMA…
		K.LSEWGVR.N	K.SIGYSGVEHNILPAEYLR.K [70.1]
		R.SGSGGLALGSSTCK.S	R.NIVLDNGK.H [69.1]
		R.NYWTSIPCQLSCLK.D	P.DKIVAPNGK.I [60.0]
		R.DFTNQLLGVQNTK.N
		K.IVYIGYLK.K
		K.SWVSASVCEK.S
		R.LNAEGAHVLVNER.F
		R.FCDHAAQLPTR.E
		K.IFLPVGCFK.D
		R.ALPEMVANLR.K
		K.TYAEYGFSK.N
		K.GVGGEHSNYVYTFV
		K.KNPGVDYEFFASR.I
		K.CNLDDKPK.G
c60596_g1_i1	Jellyfish Type II	R.ATALISATSNIPK.L	K.LMPYFDGE.S [68.7]	MMKRAVLILLAVISIQAEGYKSDIDLLTSEGEEGWMEKVIEKGKTNGQKQNEEIIRETRTTTDPYTSEKLSPQMQALDLAITKDFQPNAAKRPKRWLGKFKENWNSKNFNERQARATALISATSNIPKLANAKEDPVGAVQGVLNIMASVAQVAGPTGQLVSIGFMFVSSLLGLFGLGKKPKPIGEIVREQIDEALSEFHDRQISDEASAAVYSFRISKGYVDGAGQNRDKITDNDVGPLATNVPVLSGLRVMGLLAAQIEKFKTANDPKDVKKCFKYVELYCQLATMRSMIMSQVIGLIPDSFPSTIDGYANARVVLKDATKSMLAFLYDPSEGSKLMPYFDGESYPFTESYLKTTLGLSRPNHFPGSGYCITAFGWGKNYLGKFYESYVSPRMSHPL…
		K.KPKPIGEIVR.E
		K.SMLAFLYDPSEGSK.L
		K.EGEPGWLEELLR.K
c60639_g1_i1	Ficolin Lectin	K.GGGWTVIQR.R	K.CINVPRNCK.E [65.3]	MKAVAISVILLLVGWINAEIIQRKRYKRYQPLVDCCDCNAATKLFLAAIKNIDTKLTQCLRQGHVENDCKCINVPRNCKEILKCGCSTSGVYSVDPDGKGLFKVYCDQTTKGGGWTVIQRRKDGSVDFYQGWNDYKEGFGNLKGELWLGLDKIHRLTHQTRNRLRVELDDFTGKTNTAFAEYDNFVVSNEKNLYKLTTLGSYSGTAGDSLNYHKGFSFSTKDRDHDKSSGNCAVQYKGAWWYNDCHHSNLNGYYYHGAHKTYADGVDWKAWRGYHYSAKTAEMKIRPI
		R.LRVELDDFTGK.T
		K.SSGNCAVQYK.G
c62072_g1_i1	Disintegrin and Metalloproteinase	K.IVPLHER.M	R.VYINSGSSQITYK.L [81.5]	MIVERSLRLLLLSILFIVSFVVELQAQGSGKIVPLHERMTNQELKKYFGADSRYEVPKYEVVHPFQSDHKGDFLTYKLNHPTQHSLDEPRYFNMKAMGKNLHLKVKKSKGILAPGAKVHVIEPNGSKFVSDAKESDYYEGHVVSQPSSKVAISNDGGLAGMIQHLGDAMFIKPLPSHLARDYGLLGGAQPHVIHRRSVSNLVDCVQTKERTRRGLMPLSDASLTKRSGTPKYLETHLIADQYYFNSHGEDTQKQLLMLAHITRSFFVDPSIGDIPVNIVIVGITIKKDFTYAQSASNQDRMTALGNYLSTNVIPSSDSEAAHPDVVVLHSRGNSGGLAHESSICQATFGRTVVADIGLGSAITVAHEIAHAFGVQHDGNRADCPATFIMAPTLPGGENA…
		R.SVSNLVDCVQTK.E	K.TVADWDLLAAK.G [78.7]
		R.GNSGGLAHESSICQATFGR.T	P.LSDASLTKR.S [69.3]
		K.SAYTSYPVPDTPCK.L	K.FTKNVCIENK.C [66.3]
		K.CQNVGCDNVLDSGKVPDR.C	K.QLLMLAHITR.S [60.0]
		K.TVADWDLLAAK.G
		R.ITIDGPTNAIIK.I
		K.EGNIRHDHGNAKDGSR.C
		R.CSSADKFTK.N
		R.NEIAEGQYEIVADSLCPGTKPK.D
c63393_g1_i1	Peptidase M13	K.TNNKEETNVDIDALLATVK.G	R.VIGTLSNMK.E [68]	MRLPGYSEISYLLFLFFFIHHASPRQIRVLNTSNQPSSNEAIVKVIGTVPESSFITQPAVITTGITQLQTNDQQSAVASQTTPIYQKQTAAFQQNVGCASQDPAQVNPQPNKPNEGKSLCTQTQAKDAASSTTPESVQKSTPKVTKAAKDTAVTPSNQEAAITSQERTKEGQAASAKISKPIKTNPPKVNDEAAKQHEATIVSQKTAKEEESKEEVKVEPLEKQQNKAKKEDSAENKKQDNQAGKAEAEEHKEKVTVEETNTEEHKEEVTVTEEESSKTNNKEETNVDIDALLATVKGRKICQSSHCKAVSQSIQDSLNKSADPCENYYDYACGKWIKEHKIPKFHSQYSRISELSENNEKILLESLKKDQVTDNKTLKKLKMFFQSCMDRSGIEKDGV…
		N.EKILLESLKK.D	K.AEAEEHKEK.V [66.5]
		K.DLGSWSIDK.D	K.STLSNYMVWR.L [63.4]
		K.TWDFQETLTK.M
		K.LALISVPK.I
		K.LTNAIPEFPWKK.H
		K.HLQDVFAPK.E
		K.LIVLANDYLPNMIELLR.K
		L.FVKNAFSPE.S
		K.CLVEQFSSYK.I
		K.FHIDGLK.T
		K.LFFLGYAQK.E
		R.TSPAAEFLAVMEDVHPLSK.Y

## Sheet: DIA Peaking
Contig	Toxin Family	Peptide Match (high confidence)	Peptide Abundance (Mean Area)	Peptide Abundance (Log Mean Area)	Sequence
c32422_g1_i1	KTx Type I (ShK)	K.LCNTTCNCK.D	1751.17	3.24333	MKTTLVVVVLACIVALTSALEADLLSHESCRYISSNRYCGHDYMDKLCNTTCNCKDVLSEFSCGVLKKDGQCNKADIQAKCKLTCDKC
		K.DVLSEFSCGVLK.K	890.639	2.9497
c44161_g1_i1	Unknown	K.ESPLCSLMEER.L	8123.6	3.90975	MMSALFLVLSVSLLVSGLQGIGEATSEIKESPLCSLMEERLPDLCEVQVKIDPHYCQDHFSSCPRTCLRCKRPQKPPAPPRECKDLRTDCPRAMHSYGMDICREMSSYASMYCKSYCKLCNKR
		R.LPDLCEVQVK.I	480.356	2.68156
		K.IDPHYCQDHFSSCPR.T +++	1016.17	3.00697
		R.AMHSYGMDICR.E ++	1020.56	3.00884
c47095_g1_i1	Sea anemone toxin 8	K.FNICGELVSR.K	3055.02	3.48501	MKYLAIVFVALIGVVAISASHEEDLYELVREFANDANPRAGRCANRFKFNICGELVSRKQCAQGSRMGKFARQHCQFMCGLC
		R.QHCQFMCGLC	1113.27	3.0466
c50240_g1_i1	NaTx Type I	K.GCTCNDGTTTGIFWAGSCPGGWSYCK.T	84100.5	4.9248	MNRMLIIFVVVTVFGLASGLGPNMPAPDLAKRNGKGCTCNDGTTTGIFWAGSCPGGWSYCKTMWYWVVPGECCTQK*
		K.TMWYWVVPGECCTQ.K	37685.3	4.57617
c50551_g1_i1	KTx Type I (ShK)	R.TCESCGSECYDADPK.C	455.13	2.65814	MKIALLAVICVLLVVKDTEGRRMCRDKAPKSKCSAYHANDECWTENARKNCQRTCESCGSECYDADPKCQREDIKADLCPTKDMIGAAYLMCPRSCGLCIDE
c56806_g1_i1	Phospholipase A2	K.YVGYGCYCGLGGYGIPVDPIDECCK.T	2141.46	3.33071	MKVLQMFFCVILLCVTSVLVEAKSTTKGDETASKRNFAQFAAMTYHTTHRWPKKYVGYGCYCGLGGYGIPVDPIDECCKTHDACYKKVEDSGICSYSWAIYLTIYKRKGGAECSEDNEKCQMEVCKCDSVAAKCLGKYKDIFNEKYAGYDKKGKCDPSFTLS*
		K.CQMEVCK.C	13439.7	4.12839
c56815_g1_i2	Unknown	R.IWISGVNYIEPAK.T	5854.32	3.76748	MKFVFALFMLACTVAIIEGLGCGCGEKLRLKADNNKYWSRIWISGVNYIEPAKTELDVHSHFTVYNTDREGTVLLKADNGMYVSRIHRNGIDYIEAAKSSPDVHCRFQVIPQSDGTLAFKADNGKYLSRIYRLNTGRNTIEAAKSSIDQYCKFKPSFQCPAQ
		K.SSPDVHCR.F	759.647	2.88061
		R.FQVIPQSDGTLAFK.A	5739.44	3.75887
		K.SSIDQYCK.F	3277.61	3.51556
		K.FKPSFQCPAQ	9759.24	3.98942
c56947_g1_i1	FA58C	K.SCNILEASGACTK.D	1676.45	3.22439	MKLILILALSLATEVIMAEPQRQASQSDNVEKRATENKDLLSHISCRYLKKNRYLSVMPTLQKLCNKTFACNDVLSHKSCNILEASGACTKDSSLSEKYCKFTCDNCGTTEIKESSSKCEKPLGMESGAIPDSSISASSFYGRDFRPAIARLHHNNIGWSARSNAVGQWIQVDLGKVMSVSGIATQGRGQETPPNGQWVTSYILQYSGDGKAFKGYQGGKIFQGNTDTNKVVKHELVPPLVGRYIRLLPKTWHAWITLRMELYGLC
c60596_g1_i1	Jellyfish Type II	R.ATALISATSNIPK.L	3426.32	3.53483	MMKRAVLILLAVISIQAEGYKSDIDLLTSEGEEGWMEKVIEKGKTNGQKQNEEIIRETRTTTDPYTSEKLSPQMQALDLAITKDFQPNAAKRPKRWLGKFKENWNSKNFNERQARATALISATSNIPKLANAKEDPVGAVQGVLNIMASVAQVAGPTGQLVSIGFMFVSSLLGLFGLGKKPKPIGEIVREQIDEALSEFHDRQISDEASAAVYSFRISKGYVDGAGQNRDKITDNDVGPLATNVPVLSGLRVMGLLAAQIEKFKTANDPKDVKKCFKYVELYCQLATMRSMIMSQVIGLIPDSFPSTIDGYANARVVLKDATKSMLAFLYDPSEGSKLMPYFDGESYPFTESYLKTTLGLSRPNHFPGSGYCITAFGWGKNYLGKFYESYVSPRMSHPL…
c60639_g1_i1	Ficolin Lectin	K.GGGWTVIQR.R	2131.58	3.3287	MKAVAISVILLLVGWINAEIIQRKRYKRYQPLVDCCDCNAATKLFLAAIKNIDTKLTQCLRQGHVENDCKCINVPRNCKEILKCGCSTSGVYSVDPDGKGLFKVYCDQTTKGGGWTVIQRRKDGSVDFYQGWNDYKEGFGNLKGELWLGLDKIHRLTHQTRNRLRVELDDFTGKTNTAFAEYDNFVVSNEKNLYKLTTLGSYSGTAGDSLNYHKGFSFSTKDRDHDKSSGNCAVQYKGAWWYNDCHHSNLNGYYYHGAHKTYADGVDWKAWRGYHYSAKTAEMKIRPI

## Sheet: DDA Raw Peaking
Contig	Peptide	Peak Area (mean)	StdErr (mean)	StdErr (%)	Peak Area	StdErr	Peak Area	StdErr	Peak Area	StdErr	Peak Area	StdErr	Peak Area	StdErr	Peak Area	StdErr		Av Peak	Av Err		Comp to NaTx
c32422	K.LCNTTCNCK.D [47, 55] (rank 1)	1751.17	684.119	39.0664	432.212	136.112	3261.24	1016.29	1257.34	446.267	903.715	581.468	3513.06	1627.93	1139.47	296.651		1320.91	520.422		46.0994	15.6807
	K.DVLSEFSCGVLK.K [56, 67] (rank 2)	890.639	356.726	40.0528	884.09	328.16	1571.72	476.401	825.151	353.636	766.212	467.817	667.979	68.0573	628.687	446.282
c44161	K.ESPLCSLMEER.L [30, 40] (rank 2)	8123.6	1046.11	12.8774	5677.66	170.001	13418.1	392.147	12082.3	2166.83	7504.79	2181.25	6109.87	862.837	3948.83	503.598		4881.62	1028.58		12.4739	7.93389
	R.LPDLCEVQVK.I [41, 50] (rank 1)	480.356	784.056	163.224	200.92	240.099	4.97742	8.62114	80.4188	64.8781	39.817	67.6058	2554.87	4321.17	1.13516	1.96616
	K.IDPHYCQDHFSSCPR.T [51, 65] (rank 3) +++	1016.17	916.073	90.1493	432.533	367.176	453.069	492.332	1897.95	1717.35	2092.36	1867.77	994.052	846.402	227.081	205.413
	K.IDPHYCQDHFSSCPR.T [51, 65] (rank 3) ++++	6904.38	983.08	14.2385	707.249	235.751	1257.33	557.051	10925.7	746.35	15726.4	2838.49	1810.02	472.182	10999.7	1048.66
	R.AMHSYGMDICR.E [93, 103] (rank 4) ++	1020.56	421.778	41.328	1245.99	165.691	2855.41	1105.93	453.436	334.46	534.533	333.54	746.539	340.276	287.481	250.776
	R.AMHSYGMDICR.E [93, 103] (rank 4) +++	11744.6	2020.35	17.2024	21538.8	737.361	26061.1	6839.21	9323.87	1900.6	963.401	408.329	8965.71	1991.22	3614.86	245.392
c47095	K.FNICGELVSR.K [49, 58] (rank 1)	3055.02	779.094	25.5021	471.515	353.636	4184.69	2027.21	6679.79	1192.46	4715.15	717.028	746.565	180.063	1532.42	204.172		2084.14	490.879		29.2172	16.6245
	R.QHCQFMCGLC.- [73, 82] (rank 2)	1113.27	202.665	18.2045	825.128	0.0203327	1296.63	117.904	785.836	68.0646	982.294	68.0428	825.124	204.149	1964.58	757.807
c50240	K.GCTCNDGTTTGIFWAGSCPGGWSYCK.T [36, 61] (rank 1)	84100.5	13709.4	16.3012	64150	10088.7	115057	17787.4	43370.1	8584.43	189139	31280.3	55049.5	8911.5	37837.9	5604.08		60892.9	8160.6		1	1
	K.TMWYWVVPGECCTQK.- [62, 76] (rank 2)	37685.3	2611.82	6.9306	5638.53	630.22	27857.8	2689.97	117476	5918.73	59952.9	4836.58	5520.65	1170.41	9666.06	425.018
c50551	K.CSAYHANDECWTENAR.K [33, 48] (rank 1)	297.964	349.228	117.205	78.5841	136.112	78.5841	136.112	353.629	425.009	766.193	1081.96	432.211	180.062	78.5841	136.112		376.547	294.854		161.714	27.6768
	R.TCESCGSECYDADPK.C [54, 68] (rank 2)	455.13	240.479	52.8375	471.503	471.505	314.335	245.38	353.626	117.875	294.687	294.687	903.711	245.375	392.918	68.054			Removed due to signal quality
c56806	R.NFAQFAAMTYHTTHR.W [36, 50] (rank 2)	465.823	419.992	90.1613	158.159	178.773	394.393	357.731	236.834	202.307	551.713	488.058	510.808	476.401	943.033	816.683		4208.21	527.947		14.47	15.4572
	K.YVGYGCYCGLGGYGIPVDPIDECCK.T [55, 79] (rank 3)	2141.46	750.884	35.064	7190.6	2816.78	1100.2	531.545	2671.92	476.401	314.343	68.0573	903.737	136.115	667.979	476.401
	K.CQMEVCK.C [120, 126] (rank 1)	13439.7	742.096	5.52166	5736.6	378.883	34873.2	586.959	10880.3	966.749	11760.7	413.218	3241.57	991.476	14145.9	1115.29
	K.CQMEVCK.C [120, 126] (rank 4)	785.84	198.816	25.2998	1218.05	136.115	785.84	68.0546	550.088	180.059	864.424	378.92	825.132	311.869	471.504	117.877
c56815	R.IWISGVNYIEPAK.T [41, 53] (rank 4)	5854.32	551.189	9.41509	10137	825.549	8093.91	960.434	3182.53	471.359	1218.02	180.113	2750.34	378.818	9744.09	490.862		4263.36	899.681		14.2828	9.07055
	K.ADNGMYVSR.I [77, 85] (rank 1)	189.912	246.997	130.059	39.2921	68.0559	58.9381	58.9381	98.2302	122.689	432.213	649.212	392.921	378.919	117.876	204.168			Removed due to poor toxin identity
	K.SSPDVHCR.F [99, 106] (rank 5)	759.647	382.576	50.3624	1335.93	710.524	589.381	117.876	471.505	NA	1178.76	656.307	314.337	68.0559	667.965	360.118
	R.FQVIPQSDGTLAFK.A [107, 120] (rank 2)	5739.44	2697.43	46.9982	1807.47	852.756	1886.06	623.756	16944.2	8097.03	628.687	340.287	5363.48	3001.28	7806.79	3269.5
	K.SSIDQYCK.F [145, 152] (rank 6)	3277.61	524.32	15.997	5383.01	413.968	8722.84	1545.93	1964.6	446.272	1552.04	90.0295	1218.05	413.968	825.133	235.752
	K.FKPSFQCPAQ.- [153, 162] (rank 3)	9759.24	995.571	10.2013	22308.2	1336.99	4734.72	418.032	6227.86	1742.87	11473.4	581.184	5009.77	891.877	8801.48	1002.47
c56947	K.SCNILEASGACTK.D [79, 91] (rank 1)	1676.45	328.845	19.6156	3929.17	593.21	1728.84	296.682	923.358	302.446	1355.57	58.9368	1021.59	476.416	1100.17	245.382		974.504	315.399		62.4861	25.8739
	K.FTCDNCGTTEIK.E [102, 113] (rank 2)	272.557	301.952	110.785	649.031	579.281	277.429	293.342	196.833	244.932	353.833	513.599	157.6	179.494	0.614039	1.06355
c60596	R.ATALISATSNIPK.L [116, 128] (rank 1)	3426.32	553.676	16.1595	2278.96	720.261	4420.38	620.863	8200.5	1036.56	667.966	296.636	3438.08	302.364	1552.05	345.374		1270.89	308.099		47.9134	26.4869
	K.SMLAFLYDPSEGSK.L [324, 337] (rank 2)	147.343	156.867	106.464	157.168	180.064	39.2896	68.0515	137.517	148.314	314.333	296.653	78.5825	68.0544	157.168	180.064
	K.EGEPGWLEELLR.K [598, 609] (rank 3)	239.018	213.755	89.4308	333.968	189.436	137.513	189.447	39.2896	68.0515	550.064	547.582	255.402	170.146	117.869	117.869
c60639	K.GGGWTVIQR.R [112, 120] (rank 1)	2131.58	472.892	22.1851	628.666	206.97	5697.3	784.728	1846.71	710.505	2200.34	360.1	805.48	170.127	1610.97	604.919		2131.58	472.892		28.5671	17.2568

## Sheet: DDA Raw Peaking 2
Contig	Peptide	Peak Area (mean)	StdErr (mean)	StdErr (%)	Peak Area	StdErr	Peak Area	StdErr	Peak Area	StdErr	Peak Area	StdErr	Peak Area	StdErr	Peak Area	StdErr
KTx type I (c32422)	K.LCNTTC…	1751.17	684.119	39.0664	432.212	136.112	3261.24	1016.29	1257.34	446.267	903.715	581.468	3513.06	1627.93	1139.47	296.651
	K.DVLSEF…	890.639	356.726	40.0528	884.09	328.16	1571.72	476.401	825.151	353.636	766.212	467.817	667.979	68.0573	628.687	446.282
Unknown 12C (c44161)	K.ESPLCS…	8123.6	1046.11	12.8774	5677.66	170.001	13418.1	392.147	12082.3	2166.83	7504.79	2181.25	6109.87	862.837	3948.83	503.598
	R.LPDLCE…	8337.09	917.497	11.005	6876.26	1016.31	15616.3	1282.48	8172.92	476.401	10373.3	1504.97	6193.99	1088.7	2789.8	136.115
	K.IDPHYC…	1572.83	425.662	27.0635	697.563	118.174	604.217	337.153	3006.14	625.65	3582.9	949.696	1246.3	412.293	299.842	111.007
	K.IDPHYC…	6904.38	983.08	14.2385	707.249	235.751	1257.33	557.051	10925.7	746.35	15726.4	2838.49	1810.02	472.182	10999.7	1048.66
	R.AMHSYG…	1020.56	421.778	41.328	1245.99	165.691	2855.41	1105.93	453.436	334.46	534.533	333.54	746.539	340.276	287.481	250.776
	R.AMHSYG…	11744.6	2020.35	17.2024	21538.8	737.361	26061.1	6839.21	9323.87	1900.6	963.401	408.329	8965.71	1991.22	3614.86	245.392
Sea anemone type 8 (c47095)	K.FNICGE…	3055.02	779.094	25.5021	471.515	353.636	4184.69	2027.21	6679.79	1192.46	4715.15	717.028	746.565	180.063	1532.42	204.172
	R.QHCQFM...	1113.27	202.665	18.2045	825.128	0.0203327	1296.63	117.904	785.836	68.0646	982.294	68.0428	825.124	204.149	1964.58	757.807
NaTx type I (c50240)	K.GCTCND…	84100.5	13709.4	16.3012	64150	10088.7	115057	17787.4	43370.1	8584.43	189139	31280.3	55049.5	8911.5	37837.9	5604.08
	K.TMWYWV…	37685.3	2611.82	6.9306	5638.53	630.22	27857.8	2689.97	117476	5918.73	59952.9	4836.58	5520.65	1170.41	9666.06	425.018
Phospholipase A2 (c56806)	K.YVGYGC…	2141.46	750.884	35.064	7190.6	2816.78	1100.2	531.545	2671.92	476.401	314.343	68.0573	903.737	136.115	667.979	476.401
	K.CQMEVC…	13439.7	742.096	5.52166	5736.6	378.883	34873.2	586.959	10880.3	966.749	11760.7	413.218	3241.57	991.476	14145.9	1115.29
	K.CQMEVC…	785.84	198.816	25.2998	1218.05	136.115	785.84	68.0546	550.088	180.059	864.424	378.92	825.132	311.869	471.504	117.877
Multicopper oxidase (c56947)	K.SCNILE…	1676.45	328.845	19.6156	3929.17	593.21	1728.84	296.682	923.358	302.446	1355.57	58.9368	1021.59	476.416	1100.17	245.382
Jellyfish type II (c60596)	R.ATALIS…	3426.32	553.676	16.1595	2278.96	720.261	4420.38	620.863	8200.5	1036.56	667.966	296.636	3438.08	302.364	1552.05	345.374
Ficolin-type lectin (c60639)	K.GGGWTV…	2131.58	472.892	22.1851	628.666	206.97	5697.3	784.728	1846.71	710.505	2200.34	360.1	805.48	170.127	1610.97	604.919
