# Supplementary material for: Acontia, a Specialised Defensive Structure, Has Low Venom Complexity in Calliactis polypus
Source: Toxins (Basel). 2023 Mar 12;15(3):218. doi: 10.3390/toxins15030218 (PMC10051995; doi:10.3390/toxins15030218)
Supplement: Supplementary file 1 [file toxins-15-00218-s001.zip › toxins-2260107-Supplementary Material S3.xlsx]

## Sheet: Calliactis comparison
Functional Category	Toxin Family	Toxin Subtype	Transcript copy number	Proteome copy number
Enzyme	Lectin	C-Type	4
Enzyme	Lectin	Ficolin	2	1
Enzyme	Lipase	AB hydrolase	2
Enzyme	Lipase	Phospholipase A2	4	1
Enzyme	Lipase	Type B carboxylesterase	1
Enzyme	Metalloprotease	Disintegrin and metalloprotease	2	2
Enzyme	Metalloprotease	Peptidase M12A	8	2					Trans	Prot	% Trans	% Prot
Enzyme	Protease	Multicopper oxidase	4	1			Enzyme Total		27	7	48.2143	46.6667
Neurotoxin	Potassium channel toxin	Kazal	2
Neurotoxin	Potassium channel toxin	Type I (ShK)	4	2
Neurotoxin	Potassium channel toxin	Type II (venom kunitz)	5
Neurotoxin	Potassium channel toxin	Type III	1	1
Neurotoxin	Sodium channel toxin	Calitoxin	1	1
Neurotoxin	Sodium channel toxin	Sea anemone sodium channel toxin	2	1
Neurotoxin	Sodium channel toxin	Type I	1	1			Neurotoxin Total		16	6	28.5714	40
Unknown	Structural class peptide	Sea anemone type 8	6	1
Unknown	Structural class peptide	Sea anemone type 9	1
Unknown	Unknown	Unknown (12C)	1	1
Unknown	Unknown	Cephalotoxin	1
Unknown	Unknown	VP302	4		%		Unknown Total		13	2	23.2143	13.3333
		Total	56	15	26.7857

## Sheet: Calliactis (broad) comparison
Functional Category	Toxin Family	Toxin Subtype	Transcript copy number	Proteome copy number
	AVIT	Prokineticin
	CREC	Calcium ion binding
	Lectin	C-Type	4	0
	Lectin	Ficolin	2	1
	Lipase	AB hydrolase	2	0
	Lipase	Type B carboxylesterase	1	0
	Metalloprotease	Peptidase M12A	6	0
	Neurotoxin	Cysteine-rich venom protein opanin
	Peptidase	Peptidase M13
	Peptidase S1	Trypsin serine protease
	Membrane-active	Jellyfish type II
	Lipase	Phospholipase A2	4	1
	Lipase	Phospholipase B
	Lipase	Phospholipase D
	Potassium channel toxin	Kazal	2	0
	Potassium channel toxin	Type I (ShK)	4	2
	Potassium channel toxin	Type II (venom kunitz)	5	0
	Potassium channel toxin	Type III	1	1
	Protease	Cystatin
	Protease	Multicopper oxidase	4	1
	Sodium channel toxin	Sea anemone sodium channel toxin	1	0
	Sodium channel toxin	Type I	1	1
	Structural class peptide	Sea anemone type 8	6	1
	Structural class peptide	Sea anemone type 9	1	0
	Unknown	Unknown (12C)	1	1
	Unknown	Cephaloxtoxin	1	0
	Unknown	VP302	4	0

## Sheet: Species copy numbers
		Transcript Copy number
Superfamily	Species	KTx type III	NaTx type I	PLA2 (12C)	Sea anemone 8	Unknown 12C			Total sequences per species
Actinioidea	Actinia tenebrosa	1	1	1	6	1			10		0
Actinioidea	Actinodendron plumosum	0	0	1	0	1			2		1 - 2
Actinioidea	Anemonia sulcata	3	1	1	6	1			12		3 - 5
Actinioidea	Anthopleura buddemeieri	2	1	1	5	1			10		6+
Actinioidea	Aulactinia veratra	1	0	1	6	2			10
Actinioidea	Megalactis griffithsi	0	0	1	2	1			4		Sequencer contamination observed in A. plumosum, S. haddoni, T, stephensoni, T. producta for NaTx and sea anemone 8 families
Actinioidea	Stichodactyla mertensii	1	0	3	2	2			8		Accession IDs:
Edwardsioidea	Edwardsiella carnea	0	0	1	4	1			6		A.plumosum -
Edwardsioidea	Nematostella vectensis	0	0	1	3	1			5		S. haddoni -
Metridioidea	Calliactis polypus	1	3	4	9	2			19		T.stephensoni -
Metridioidea	Exaiptasia diaphana	1	0	2	4	2			9		T.product -
Metridioidea	Nemanthus annamensis	1	6	2	5	2			16
Metridioidea	Telmatactis stephensoni	2	0	3	7	2			14
Metridioidea	Triactis producta	2	0	1	3	2			8
	Total	15	12	23	62	21

## Sheet: Telmatactis comparison
Comparison of Calliactis Acontia homologous sequences of the five toxins of interest
Contig	Toxin Family	Peptide Matches (> 0.95)	Peptide Matches (> 0.60)	Clusters with Acontia (Y/N)	Sequence
TR17993|c0_g1_i1	Sea anemone 8	0	3	N	MKSMVIVFLVLLGVAMISANDEELLEILREERNDADARRACGNAYKSNICGRLVTPLHCMSSKSRMGRFARSKCKFMCGMC
TR22533|c0_g1_i1	KTx type III	1	1	N (sister group)	MKMTSWFVLLLFCCLEVTASTMTELNSETTAKEDPVKRGVSCIDKCKGQKAEYWFGIKYCHPSPRLRADCSAFLGRCCVYADR
TR26744|c0_g1_i1	PLA2	2	4	Y	MEFLQLFSYVTLMCVTSALVKGKTTSRGDETASKRNVLQFAKMTWHTTNRNPHKYVGYGCWCGFGGYGIPVDPIDECCRQHDHCYLRSEGICARPRDVYTAWYKLNERSECSDENNECKMAVCKCDSIAAICLGQHKDIFKEKYAGYNKIELCDPDFTE
TR3057|c0_g1_i1	Unknown 12C	1	3	N	MAKLLACLLCIFALIAYSQAYYRTSKLRGLLEDILNEESKEDCKTWKDESASCKRRVAEDPNYCKDYANDALVMALCKRSCSPCGPEPEKELGPIVVCEDQRADCGRVYKQFEIMFKEKPCTSHPRYSYLYCRRHCNFCKK
TR34510|c0_g1_i2	PLA2	1	2	N (14C)	MKFPLLLFCLTLLCVTLLHAKAKLTASTREENPTKRNLIQFAQMTQCETKRSPIKYVGYGCWCGLGGYGKAVDEIDECCRVHDNCFKQVQEKKVCRFSFYVYTEIYKIKGCSDCSEDNNECEMAICKCDSAAAKCLGSNKDKFNTEYENYDKKKKCDKKITK
TR37606|c0_g1_i1	Sea anemone 8	3	6	N	MASTRLFVLLIIGTVLLCHVSGFLEEWLAEHELPEEEKRGCKNAYSRAICGKVITAAHCMRKKGSRMGSFARKKCMRLCGLC
TR53290|c1_g1_i1	Sea anemone 8	1	4	N	MASLRLLVLFMIGAVLLCAVSADPLLDEMLKEYEITAEQDPRCVNRYKFNICGKVIQASHCQSSRKKKMAAFARKNCRRFCGLC
TR6296|c0_g1_i1	Sea anemone 8	1	2	N	MASLRLLVLFMLGAVLLCAVSAEETLTEYEENDSGKITSDGHRGCKDKFKTNICGEIIKWKHCLSGRRSRMGRFAIRYCKRFCRVC
Possible true toxins removed due to contamination
