# Supplementary material for: Acontia, a Specialised Defensive Structure, Has Low Venom Complexity in Calliactis polypus
Source: Toxins (Basel). 2023 Mar 12;15(3):218. doi: 10.3390/toxins15030218 (PMC10051995; doi:10.3390/toxins15030218)
Supplement: Supplementary file 1 [file toxins-15-00218-s001.zip › toxins-2260107-Supplementary Material S4.xlsx]

## Sheet: ORF
		Sites with Purifying/Negative Selection										52	sites	but 52 with small conf error between iterations - codon 1 and 59 have >10
		DataMonkey 2.0 Ref (10.1093/molbev/msx335)				DataMonkey FEL analysis						All Cysteine sites have beta=0
						100 iterations with Syn Rate Variation and Profile Likelihood for each site
		Whole sequence for mature protein				3 Replicates performed with 54, 55, 56 purifying sites and 0, 1, 1 diversifying sites, respectively, at <0.05 pValue
		Codon	AA	Seq Notes	dN/dS							Codon	alpha	beta	alpha=beta	LRT	p-value	Branch length	dN/dS LB	dN/dS MLE	dN/dS UB	p-asmp
		3	Y		0.0668768							3	2.856	0.191	0.432	7.756	0.0198	8.99	0.019	0.067	0.181	0.0054
		15	L		0.0278488							15	3.519	0.098	0.304	15.194	0.0099	6.313	0.007	0.028	0.076	0.0001
		18	D		0.0658751							18	2.611	0.172	0.256	6.879	0.0198	5.314	0.028	0.066	0.136	0.0087
		19	L		0.184275							19	1.221	0.225	0.392	4.479	0.0495	8.141	0.069	0.185	0.414	0.0343
		27	L/P		0.178311							27	0.959	0.171	0.302	7.285	0.0099	6.28	0.074	0.179	0.37	0.007
		40	C		beta=0							40	1.353	0	0.109	21.454	0.0099	2.261	0	0	0.034	0
		45	D		0.0114665							45	1.657	0.019	0.124	22.009	0.0099	2.569	0.001	0.011	0.051	0
		48	P		0.0699433							48	0.529	0.037	0.119	10.693	0.0099	2.465	0.012	0.07	0.219	0.0011
		51	C		beta=0							51	6.602	0	0.13	27.235	0.0099	2.696	0	0	0.007	0
		55	L		0.08933							55	1.612	0.144	0.358	13.422	0.0099	7.447	0.032	0.089	0.199	0.0002
		63	D		0.0180343							63	2.218	0.04	0.113	12.473	0.0099	2.353	0.003	0.018	0.056	0.0004
		64	P		0.085752							64	2.274	0.195	0.346	11.327	0.0099	7.196	0.04	0.086	0.161	0.0008
		67	Y		0.00429448							67	6.52	0.028	0.171	21.797	0.0099	3.552	0	0.004	0.019	0
		68	C		beta=0							68	1.815	0	0.11	22.616	0.0099	2.279	0	0	0.026	0
		70	D		beta=0							70	3.106	0	0.138	39.639	0.0099	2.865	0	0	0.011	0
		71	Y		0.111714							71	0.922	0.103	0.187	6.464	0.0297	3.885	0.034	0.112	0.272	0.011
		75	P		0.118708							75	1.331	0.158	0.308	8.128	0.0198	6.404	0.041	0.119	0.268	0.0044
		81	V	only 5 seq	beta=0							81	61.857	0	0.141	7.43	0.0099	2.923	0	0	0.003	0.0064
		84	F		0.0937908							84	3.06	0.287	0.417	5.997	0.0297	8.669	0.044	0.094	0.177	0.0143
		85	C		beta=0							85	1.353	0	0.103	20.469	0.0099	2.143	0	0	0.034	0
		86	K/R		0.00847131							86	12.985	0.11	0.313	22.934	0.0099	6.515	0.003	0.008	0.019	0
		87	R		beta=0							87	0.366	0	0.086	13.882	0.0099	1.778	0	0	0.118	0.0002
		88	T		0.0176027							88	2.386	0.042	0.215	24.75	0.0099	4.469	0.003	0.018	0.055	0
		89	C		beta=0							89	0.571	0	0.079	15.008	0.0099	1.652	0	0	0.078	0.0001
		90	S		0.142596							90	0.547	0.078	0.142	5.922	0.0297	2.945	0.044	0.143	0.343	0.015
		91	P		0.158568							91	1.173	0.186	0.313	7.536	0.0198	6.516	0.07	0.158	0.311	0.006
		92	C		beta=0							92	6.695	0	0.132	30.123	0.0099	2.738	0	0	0.007	0
		94	P		8.34131e-05							94	227.782	0.019	0.18	39.332	0.0099	3.746	0	0	0	0
		98	L/E/Q	mixed AA	0.102065							98	3.341	0.341	0.675	7.834	0.0198	14.028	0.049	0.102	0.213	0.0051
		99	K		beta=0							99	0.754	0	0.093	19.371	0.0099	1.943	0	0	0.053	0
		102	A/G		0.180258							102	1.165	0.21	0.338	6.192	0.0297	7.038	0.08	0.18	0.355	0.0128
		107	C		beta=0							107	0.829	0	0.085	16.329	0.0099	1.774	0	0	0.057	0.0001
		108	E		0.0919978							108	1.837	0.169	0.281	8.809	0.0099	5.853	0.039	0.092	0.188	0.003
		109	D		0.0548961							109	0.674	0.037	0.102	10.183	0.0099	2.128	0.009	0.055	0.174	0.0014
		111	R		beta=0							111	0.947	0	0.174	24.049	0.0099	3.61	0	0	0.047	0
		113	D		beta=0							113	0.423	0	0.048	12.671	0.0099	0.992	0	0	0.081	0.0004
		114	C		beta=0							114	2.087	0	0.113	25.389	0.0099	2.346	0	0	0.022	0
		124	L	mixed AA	0.101621							125	3.454	0.351	0.477	4.441	0.0396	9.915	0.05	0.102	0.191	0.0351
		129	H/N/P	mixed AA	0.0168038							129	8.629	0.145	0.361	21.466	0.0099	7.504	0.007	0.017	0.034	0
		130	C		beta=0							130	0.766	0	0.083	16.462	0.0099	1.725	0	0	0.059	0
		133	Q/H/Y/M	mixed AA	0.04964							133	2.639	0.131	0.204	7.702	0.0396	4.241	0.02	0.05	0.104	0.0055
		138	Y		0.0577508							138	0.987	0.057	0.157	10.014	0.0099	3.269	0.01	0.058	0.183	0.0016
		139	A		0.0913462							139	0.416	0.038	0.106	8.132	0.0198	2.194	0.015	0.092	0.288	0.0043
		140	S/F/Y/L	mixed AA	0.0147634							140	26.823	0.396	0.655	8.657	0.0198	13.622	0.007	0.015	0.028	0.0033
		142	Y		0.138015							142	0.413	0.057	0.119	4.333	0.0198	2.482	0.023	0.138	0.439	0.0374
		143	C		beta=0							143	0.246	0	0.039	7.251	0.0198	0.804	0	0	0.181	0.0071
		144	K/R		0.126065							144	1.174	0.148	0.311	10.367	0.0099	6.476	0.049	0.126	0.27	0.0013
		147	C		beta=0							147	0.586	0	0.08	15.154	0.0099	1.661	0	0	0.076	0.0001
		150	C		beta=0							150	23.626	0	0.131	31.814	0.0099	2.716	0	0	0.002	0
		152	Q/S		0.0154229							152	25.741	0.397	0.568	10.913	0.0099	11.813	0.008	0.015	0.029	0.001
		155	L	missing 7 seq	0.187013							155	1.155	0.216	0.409	5.925	0.0297	8.499	0.064	0.187	0.439	0.0149
		172	P	missing 7 seq	0.0636872							172	0.895	0.057	0.176	10.801	0.0099	3.658	0.01	0.064	0.202	0.001
												1	10000	0.413	1717.48	1.301	0.0099	35712.1	0	0	10000	0.254
												59	6321.14	0.257	4999.25	1.688	0.0099	103951	0	0	10000	0.1939

## Sheet: Cysteine Bound
		Sites with Purifying/Negative Selection										46	sites	but 45 with small conf error between iterations - codon 1 and 59 have >10
		DataMonkey 2.0 Ref (10.1093/molbev/msx335)				DataMonkey FEL analysis						All Cysteine sites have beta=0
						100 iterations with Syn Rate Variation and Profile Likelihood for each site
		Trimmed sequence from 1st and last cysteine residue of mature protein
		Codon	AA	Seq Notes	dN/dS							codon	alpha	beta	alpha=beta	LRT	p-value	Total branch length	dN/dS LB	dN/dS MLE	dN/dS UB	p-asmp
		1	C		0							1	1.353	0	0.117	20.956	0.0099	2.263	0	0	0.037	0
		6	D		0.0104712							6	1.91	0.02	0.133	22.095	0.0099	2.573	0.001	0.011	0.048	0
		9	P		0.075188							9	0.532	0.04	0.127	10.556	0.0099	2.46	0.012	0.075	0.234	0.0012
		12	C		0							12	5.719	0	0.14	26.305	0.0099	2.699	0	0	0.009	0
		16	L/V		0.0967537							16	1.571	0.152	0.377	13.404	0.0099	7.287	0.034	0.097	0.214	0.0003
		24	D		0.0208333							24	2.016	0.042	0.12	11.999	0.0099	2.33	0.003	0.021	0.066	0.0005
		25	P		0.107521							25	1.888	0.203	0.358	10.823	0.0198	6.914	0.051	0.107	0.202	0.001
		28	Y		0.00463703							28	6.254	0.029	0.184	20.526	0.0099	3.553	0	0.005	0.021	0
		29	C		0							29	1.775	0	0.118	22.119	0.0099	2.281	0	0	0.028	0
		31	D		0							31	3.263	0	0.149	39.18	0.0099	2.876	0	0	0.012	0
		32	Y		0.111111							32	0.99	0.11	0.198	6.423	0.0198	3.822	0.034	0.111	0.269	0.0113
		36	P		0.143099							36	1.181	0.169	0.325	7.519	0.0198	6.29	0.051	0.143	0.323	0.0061
		42	V	only 5 seq	0							42	11.754	0	0.151	6.924	0.0198	2.917	0	0	0.016	0.0085
		45	F		0.10346							45	2.89	0.299	0.424	5.255	0.0297	8.197	0.05	0.104	0.196	0.0219
		46	C		0							46	1.353	0	0.111	20.678	0.0099	2.151	0	0	0.036	0
		47	K/R		0.00800326							47	14.744	0.118	0.334	21.782	0.0099	6.466	0.003	0.008	0.018	0
		48	R		0							48	0.416	0	0.092	14.412	0.0099	1.775	0	0	0.109	0.0001
		49	T		0.0190194							49	2.366	0.045	0.229	25.037	0.0099	4.437	0.003	0.019	0.059	0
		50	C		0							50	0.607	0	0.085	14.995	0.0099	1.651	0	0	0.079	0.0001
		51	S		0.14955							51	0.555	0.083	0.148	5.612	0.0396	2.859	0.046	0.149	0.356	0.0178
		52	P		0.188406							52	1.035	0.195	0.325	7.039	0.0198	6.286	0.084	0.189	0.367	0.008
		53	C		0							53	6.414	0	0.141	28.87	0.0099	2.718	0	0	0.008	0
		55	P		6.30402e-05							55	301.395	0.019	0.2	39.365	0.0099	3.873	0	0	0	0
		59	L/E/Q	mixed AA	0.108444							59	3.375	0.366	0.67	7.198	0.0297	12.962	0.053	0.108	0.222	0.0073
		60	K		0							60	0.796	0	0.102	19.213	0.0099	1.977	0	0	0.055	0
		63	A/G		0.200893							63	1.12	0.225	0.355	5.57	0.0396	6.86	0.09	0.201	0.394	0.0183
		64	P		0.15508							64	0.374	0.058	0.131	6.741	0.0099	2.528	0.039	0.156	0.41	0.0094
		68	C		0							68	0.812	0	0.092	15.925	0.0099	1.774	0	0	0.062	0.0001
		69	E		0.099889							69	1.802	0.18	0.295	8.218	0.0099	5.699	0.042	0.1	0.204	0.0041
		70	D		0.0539084							70	0.742	0.04	0.11	10.28	0.0099	2.131	0.009	0.054	0.17	0.0013
		72	R		0							72	0.955	0	0.179	23.258	0.0099	3.454	0	0	0.05	0
		74	D		0							74	0.453	0	0.052	12.631	0.0099	0.998	0	0	0.082	0.0004
		75	C	mixed AA	0							75	2.218	0	0.122	25.245	0.0099	2.356	0	0	0.022	0
		89	D/N		0.204436							89	1.037	0.212	0.278	3.413	0.0495	5.372	0.095	0.204	0.396	0.0647
		90	H/N/P		0.0154034							90	9.803	0.151	0.376	22.141	0.0099	7.274	0.006	0.015	0.031	0
		91	C	mixed AA	0							91	0.813	0	0.089	16.256	0.0099	1.715	0	0	0.06	0.0001
		94	Q/H/Y/M		0.0464666							94	3.099	0.144	0.227	8.691	0.0099	4.399	0.019	0.046	0.096	0.0032
		99	Y		0.0612245							99	1.029	0.063	0.174	9.73	0.0099	3.365	0.01	0.062	0.195	0.0018
		100	A	mixed AA	0.0841889							100	0.487	0.041	0.116	8.724	0.0099	2.237	0.014	0.084	0.264	0.0031
		101	S/F/Y/L		0.0154337							101	28.185	0.435	0.697	7.226	0.0099	13.473	0.008	0.015	0.03	0.0072
		103	Y		0.138322							103	0.441	0.061	0.128	4.296	0.0495	2.484	0.023	0.139	0.444	0.0382
		104	C		0							104	0.266	0	0.042	7.28	0.0099	0.804	0	0	0.179	0.007
		105	K/R		0.129967							105	1.208	0.157	0.33	10.202	0.0099	6.386	0.05	0.13	0.277	0.0014
		108	C		0							108	0.636	0	0.086	15.216	0.0099	1.661	0	0	0.076	0.0001
		111	C		0							111	23.981	0	0.144	32.455	0.0099	2.776	0	0	0.002	0
												27	319.519	0.223	10000	0.493	0.0099	193383	0	0.001	10000	0.4825
